# Supplementary material for: A morphological traits dataset of Heteroptera sampled in biodiversity priority areas of Southwest China
Source: Springer Nature journal article supplement (doi:10.1038/s41597-024-03556-x), 2024-06-26
Supplement: 41597_2024_3556_MOESM1_ESM.pdf [file 41597_2024_3556_MOESM1_ESM.pdf]

**Supplementary information of Morphometric measures of Heteroptera sampled in China**

Supplementary Table S1 The record sheet used for transects in the field

Supplementary Table S2 The record sheet used for light trapping in the field

Supplementary Table S1 The record sheet used for transects in the field

|                            |                                                                         |                         |                                            |                               |                   |                                 |  |
|----------------------------|-------------------------------------------------------------------------|-------------------------|--------------------------------------------|-------------------------------|-------------------|---------------------------------|--|
| <b>Site No.</b>            |                                                                         | <b>Site name</b>        | Province, county, township (town), village |                               |                   |                                 |  |
| <b>Start</b>               | <b>Latitude</b>                                                         |                         | <b>Longitude</b>                           |                               |                   |                                 |  |
| <b>End</b>                 | <b>Latitude</b>                                                         |                         | <b>Longitude</b>                           |                               |                   |                                 |  |
| <b>Elevation</b>           |                                                                         | <b>Data</b>             |                                            | <b>Time</b>                   |                   | <b>Team</b>                     |  |
| <b>Weather</b>             |                                                                         | <b>Temp.</b>            |                                            | <b>Humidity</b>               |                   | <b>micro-topo<br/>graphy</b>    |  |
| <b>Vegetation<br/>type</b> |                                                                         | <b>Habitat<br/>type</b> |                                            | <b>Disturbance<br/>type</b>   |                   | <b>Disturbance<br/>strength</b> |  |
| <b>Grid No.</b>            |                                                                         |                         |                                            | <b>Habitat photos<br/>No.</b> |                   |                                 |  |
| <b>Specimen<br/>No.</b>    | <b>Collection methods (net<br/>sweeping, hand picking,<br/>shaking)</b> |                         |                                            | <b>Number</b>                 | <b>photos No.</b> | <b>Remarks</b>                  |  |
|                            |                                                                         |                         |                                            |                               |                   |                                 |  |
|                            |                                                                         |                         |                                            |                               |                   |                                 |  |

Supplementary Table S2 The record sheet used for light trapping in the field

|                            |  |                         |                                            |                             |  |                                 |  |
|----------------------------|--|-------------------------|--------------------------------------------|-----------------------------|--|---------------------------------|--|
| <b>Site No.</b>            |  | <b>Site name</b>        | Province, county, township (town), village |                             |  |                                 |  |
| <b>Data</b>                |  | <b>Start time</b>       |                                            | <b>End time</b>             |  | <b>Duration</b>                 |  |
| <b>Elevation</b>           |  | <b>Latitude</b>         |                                            | <b>Longitude</b>            |  | <b>Team</b>                     |  |
| <b>Weather</b>             |  | <b>Temp.</b>            |                                            | <b>Humidity</b>             |  | <b>micro-topo<br/>graphy</b>    |  |
| <b>Vegetation<br/>type</b> |  | <b>Habitat<br/>type</b> |                                            | <b>Disturbance<br/>type</b> |  | <b>Disturbance<br/>strength</b> |  |
| <b>Grid No.</b>            |  |                         |                                            | <b>Habitat photos No.</b>   |  |                                 |  |
| <b>Specimen No.</b>        |  | <b>Number</b>           |                                            | <b>Photos No.</b>           |  | <b>Remarks</b>                  |  |
|                            |  |                         |                                            |                             |  |                                 |  |
|                            |  |                         |                                            |                             |  |                                 |  |
